# Supplementary material for: Accurate calculation of spin-state energy gaps in Fe(iii) spin-crossover systems using density functional methods
Source: Royal Society of Chemistry journal article supplement (doi:10.1039/d1dt03335b), 2021-01-01
Supplement: d1dt03335b1.pdf [file d1dt03335b1.pdf]

Accurate calculation of spin-state energy gaps in Fe(III)  
Spin-Crossover systems using Density Functional Methods

## Supporting Information

*Daniel Vidal<sup>[1,2]</sup>, Jordi Cirera<sup>[1]</sup>\* and Jordi Ribas-Arino<sup>[2]</sup>\**

[1] Departament de Química Inorgànica i Orgànica and Institut de Recerca de Química Teòrica i Computacional, Universitat de Barcelona, Diagonal 645, 08028 Barcelona, Spain

[2] Departament de Ciència de Materials i Química Física and Institut de Recerca de Química Teòrica i Computacional, Universitat de Barcelona, Diagonal 645, 08028 Barcelona, Spain

e-mail: [j.ribas@ub.edu](mailto:j.ribas@ub.edu)

e-mail: [jordi.cirera@qi.ub.es](mailto:jordi.cirera@qi.ub.es)

|                                                                  |     |
|------------------------------------------------------------------|-----|
| DFT energies and lowest frequencies for all SCO studied systems  | S1  |
| Effect of the Hartree-Fock exchange on the spin-state energy gap | S8  |
| Cartesian geometries for the B3LYP* optimized geometries         | S9  |
| Experimental data for the studied systems in bulk phase          | S10 |
| Experimental data for the studied systems in solution            | S11 |

S-1 DFT energies and lowest frequencies for all SCO studied systems. Energies in atomic units, energy differences ( $\Delta E$ ) in kcal/mol and frequencies in  $\text{cm}^{-1}$ .  $L_{19}$  = (3-methoxysalicylideneaminopropyl)amine.

Method: **B3LYP**

| <i>System</i> | <i>Refcode</i>                   | $E(S=5/2)$ | $E(S=1/2)$ | $\Delta E$ | $\nu(S=5/2)$ | $\nu(S=1/2)$ |
|---------------|----------------------------------|------------|------------|------------|--------------|--------------|
| <b>1</b>      | ATOJUO01                         | -3158.09   | -3158.08   | -3.58946   | 11.95        | 18.52        |
| <b>2</b>      | TAMTEH02                         | -4399.51   | -4399.50   | -2.82083   | 14.75        | 18.82        |
| <b>3</b>      | SUPHUH                           | -2865.94   | -2865.94   | -0.38652   | 16.09        | 17.75        |
| <b>4</b>      | BIMZUU                           | -2718.59   | -2718.58   | -3.06256   | 13.11        | 17.83        |
| <b>5</b>      | GOWSES                           | -2708.57   | -2708.57   | -2.73144   | 16.82        | 22.18        |
| <b>6</b>      | DADFAR                           | -3113.66   | -3113.66   | -1.98547   | 12.01        | 14.32        |
| <b>7</b>      | DADFOF                           | -5117.03   | -5117.03   | -1.52971   | 10.11        | 12.17        |
| <b>8</b>      | DADGAS                           | -2790.70   | -2790.70   | -2.99520   | 12.90        | 15.59        |
| <b>9</b>      | FONNAZ                           | -3114.04   | -3114.03   | -3.49126   | 13.83        | 16.42        |
| <b>10</b>     | HAJLAH                           | -2718.57   | -2718.57   | -2.97758   | 15.69        | 21.51        |
| <b>11</b>     | PORBUV                           | -8013.11   | -8013.11   | -0.26565   | 09.08        | 9.37         |
| <b>12</b>     | LIGZUY                           | -4077.36   | -4077.35   | -3.28604   | 8.33         | 12.25        |
| <b>13</b>     | LIZZUR                           | -2672.91   | -2672.90   | -3.00024   | 16.63        | 20.94        |
| <b>14</b>     | XIZKEY                           | -3460.35   | -3460.35   | -0.28265   | 7.70         | 7.66         |
| <b>15</b>     | XUJDOX                           | -2901.99   | -2901.99   | -2.36507   | 14.08        | 18.69        |
| <b>16</b>     | DETBEJ                           | -2641.96   | -2641.96   | -1.84446   | 21.77        | 25.43        |
| <b>17</b>     | FEWVIM                           | -2444.15   | -2444.16   | 1.42395    | 19.14        | 37.60        |
| <b>18</b>     | $[\text{Fe}(L_{19})\text{py}]^+$ | -2831.73   | -2831.72   | -1.88160   | 22.82        | 24.99        |

Method: **TPSSH**

| <i>System</i> | <i>Refcode</i>                        | $E(S=5/2)$ | $E(S=1/2)$ | $\Delta E$ | $\nu(S=5/2)$ | $\nu(S=1/2)$ |
|---------------|---------------------------------------|------------|------------|------------|--------------|--------------|
| <b>1</b>      | ATOJUO01                              | -3158.14   | -3158.15   | 7.9633     | 12.35        | 17.47        |
| <b>2</b>      | TAMTEH02                              | -4399.59   | -4399.60   | 9.3186     | 13.56        | 13.83        |
| <b>3</b>      | SUPHUH                                | -2866.03   | -2866.05   | 11.3179    | 16.03        | 17.98        |
| <b>4</b>      | BIMZUU                                | -2718.65   | -2718.67   | 8.8660     | 12.71        | 17.05        |
| <b>5</b>      | GOWSES                                | -2708.64   | -2708.65   | 8.6627     | 16.20        | 21.54        |
| <b>6</b>      | DADFAR                                | -3113.74   | -3113.76   | 9.6768     | 11.51        | 13.80        |
| <b>7</b>      | DADFOF                                | -5117.00   | -5117.02   | 10.0961    | 9.44         | 12.43        |
| <b>8</b>      | DADGAS                                | -2790.78   | -2790.79   | 8.4669     | 11.94        | 15.08        |
| <b>9</b>      | FONNAZ                                | -3114.10   | -3114.12   | 8.0898     | 12.42        | 16.13        |
| <b>10</b>     | HAJLAH                                | -2718.64   | -2718.65   | 9.0347     | 15.19        | 20.42        |
| <b>11</b>     | PORBUV                                | -8012.98   | -8013.00   | 11.4401    | 09.03        | 9.40         |
| <b>12</b>     | LIGZUY                                | -4077.41   | -4077.42   | 8.3045     | 8.41         | 11.58        |
| <b>13</b>     | LIZZUR                                | -2672.98   | -2673.00   | 9.1638     | 13.99        | 18.19        |
| <b>14</b>     | XIZKEY                                | -3460.08   | -3460.09   | 11.8423    | 6.15         | 7.96         |
| <b>15</b>     | XUJDOX                                | -2902.07   | -2902.09   | 9.5018     | 12.47        | 17.46        |
| <b>16</b>     | DETBEJ                                | -2642.04   | -2642.05   | 8.4216     | 20.47        | 22.03        |
| <b>17</b>     | FEWVIM                                | -2444.21   | -2444.23   | 14.1331    | 14.91        | 38.22        |
| <b>18</b>     | [Fe(L <sub>19</sub> )py] <sup>+</sup> | -2831.80   | -2831.82   | 10.1615    | 21.66        | 22.13        |

Method: **M06L**

| <i>System</i> | <i>Refcode</i>                        | $E(S=5/2)$ | $E(S=1/2)$ | $\Delta E$ | $\nu(S=5/2)$ | $\nu(S=1/2)$ |
|---------------|---------------------------------------|------------|------------|------------|--------------|--------------|
| <b>1</b>      | ATOJUO01                              | -3157.85   | -3157.84   | -8.72625   | 12.54        | 17.22        |
| <b>2</b>      | TAMTEH02                              | -4399.21   | -4399.21   | -3.47804   | 7.73         | 11.10        |
| <b>3</b>      | SUPHUH                                | -2865.69   | -2865.68   | -7.14870   | 14.33        | 12.88        |
| <b>4</b>      | BIMZUU                                | -2718.33   | -2718.32   | -8.90440   | 10.37        | 13.36        |
| <b>5</b>      | GOWSES                                | -2708.34   | -2708.33   | -9.37528   | 14.91        | 24.75        |
| <b>6</b>      | DADFAR                                | -3113.41   | -3113.39   | -9.57861   | 11.42        | 11.28        |
| <b>7</b>      | DADFOF                                | -5116.68   | -5116.67   | -9.07248   | 04.02        | 8.93         |
| <b>8</b>      | DADGAS                                | -2790.46   | -2790.44   | -10.72620  | 12.15        | 13.26        |
| <b>9</b>      | FONNAZ                                | -3113.78   | -3113.76   | -10.73816  | 13.99        | 10.13        |
| <b>10</b>     | HAJLAH                                | -2718.32   | -2718.31   | -7.92237   | 16.82        | 12.25        |
| <b>11</b>     | PORBUV                                | -8012.63   | -8012.62   | -6.83773   | 8.66         | 07.09        |
| <b>12</b>     | LIGZUY                                | -4077.09   | -4077.08   | -8.35673   | 11.40        | 11.44        |
| <b>13</b>     | LIZZUR                                | -2672.68   | -2672.66   | -9.01772   | 13.16        | 26.10        |
| <b>14</b>     | XIZKEY                                | -3460.25   | -3460.24   | -6.73197   | 07.02        | 5.66         |
| <b>15</b>     | XUJDOX                                | -2901.73   | -2901.72   | -8.19558   | 10.47        | 23.41        |
| <b>16</b>     | DETBEJ                                | -2641.73   | -2641.72   | -5.15064   | 12.37        | 22.60        |
| <b>17</b>     | FEWVIM                                | -2443.96   | -2443.95   | -3.63793   | 14.08        | 32.51        |
| <b>18</b>     | [Fe(L <sub>19</sub> )py] <sup>+</sup> | -2831.47   | -2831.46   | -5.62529   | 17.47        | 22.33        |

Method: **B3LYP\***

| <i>System</i> | <i>Refcode</i>                        | <i>E(S=5/2)</i> | <i>E(S=1/2)</i> | $\Delta E$ | $\nu(S=5/2)$ | $\nu(S=1/2)$ |
|---------------|---------------------------------------|-----------------|-----------------|------------|--------------|--------------|
| <b>1</b>      | ATOJUO01                              | -3145.68        | -3145.68        | 2.23979    | 12.09        | 18.66        |
| <b>2</b>      | TAMTEH02                              | -4383.00        | -4383.01        | 3.670303   | 14.12        | 17.12        |
| <b>3</b>      | SUPHUH                                | -2852.44        | -2852.45        | 5.98348    | 14.88        | 17.75        |
| <b>4</b>      | BIMZUU                                | -2706.13        | -2706.13        | 2.85231    | 12.47        | 17.53        |
| <b>5</b>      | GOWSES                                | -2696.38        | -2696.38        | 3.05123    | 16.26        | 21.88        |
| <b>6</b>      | DADFAR                                | -3099.88        | -3099.89        | 3.79279    | 11.77        | 14.01        |
| <b>7</b>      | DADFOF                                | -5100.23        | -5100.24        | 4.30647    | 9.94         | 12.01        |
| <b>8</b>      | DADGAS                                | -2777.76        | -2777.77        | 2.80006    | 12.64        | 15.76        |
| <b>9</b>      | FONNAZ                                | -3100.41        | -3100.41        | 2.28323    | 12.67        | 16.21        |
| <b>10</b>     | HAJLAH                                | -2706.11        | -2706.11        | 2.98198    | 15.03        | 21.19        |
| <b>11</b>     | PORBUV                                | -7990.69        | -7990.70        | 5.78267    | 9.21         | 9.34         |
| <b>12</b>     | LIGZUY                                | -4062.23        | -4062.24        | 2.52559    | 8.60         | 12.29        |
| <b>13</b>     | LIZZUR                                | -2660.75        | -2660.75        | 2.91777    | 16.13        | 20.14        |
| <b>14</b>     | XIZKEY                                | -3444.77        | -3444.78        | 6.18430    | 6.13         | 7.72         |
| <b>15</b>     | XUJDOX                                | -2888.42        | -2888.43        | 3.44719    | 13.67        | 18.34        |
| <b>16</b>     | DETBEJ                                | -2629.87        | -2629.88        | 3.94010    | 20.97        | 25.42        |
| <b>17</b>     | FEWVIM                                | -2433.55        | -2433.56        | 7.61202    | 17.92        | 36.59        |
| <b>18</b>     | [Fe(L <sub>19</sub> )py] <sup>+</sup> | -2818.53        | -2818.53        | 3.69018    | 21.88        | 25.28        |

Method: **OPBE**

| <i>System</i> | <i>Refcode</i>                        | $E(S=5/2)$ | $E(S=1/2)$ | $\Delta E$ | $\nu(S=5/2)$ | $\nu(S=1/2)$ |
|---------------|---------------------------------------|------------|------------|------------|--------------|--------------|
| <b>1</b>      | ATOJUO01                              | -3157.74   | -3157.74   | 2.78935    | 13.16        | 20.92        |
| <b>2</b>      | TAMTEH02                              | -4399.00   | -4399.00   | 0.02077    | 16.43        | 14.46        |
| <b>3</b>      | SUPHUH                                | -2865.42   | -2865.43   | 2.37829    | 16.31        | 19.78        |
| <b>4</b>      | BIMZUU                                | -2718.11   | -2718.10   | -4.04334   | 12.54        | 18.75        |
| <b>5</b>      | GOWSES                                | -2708.11   | -2708.11   | -2.29771   | 16.80        | 24.01        |
| <b>6</b>      | DADFAR                                | -3113.16   | -3113.16   | -0.77115   | 12.76        | 15.14        |
| <b>7</b>      | DADFOF                                | -5117.23   | -5117.22   | -0.32357   | 11.03        | 13.88        |
| <b>8</b>      | DADGAS                                | -2790.21   | -2790.20   | -2.28512   | 13.13        | 16.14        |
| <b>9</b>      | FONNAZ                                | -3113.52   | -3113.52   | -2.14663   | 13.76        | 18.36        |
| <b>10</b>     | HAJLAH                                | -2718.09   | -2718.09   | -3.20042   | 15.48        | 23.22        |
| <b>11</b>     | PORBUV                                | -8014.04   | -8014.04   | 1.99303    | 10.22        | 10.30        |
| <b>12</b>     | LIGZUY                                | -4076.94   | -4076.95   | 3.19098    | 8.94         | 13.77        |
| <b>13</b>     | LIZZUR                                | -2672.48   | -2672.47   | -3.09089   | 13.65        | 23.84        |
| <b>14</b>     | XIZKEY                                | -3460.49   | -3460.49   | 2.78306    | 7.30         | 8.66         |
| <b>15</b>     | XUJDOX                                | -2901.45   | -2901.44   | -3.85448   | 11.72        | 17.70        |
| <b>16</b>     | DETBEJ                                | -2641.53   | -2641.52   | -3.28918   | 6.26         | 16.53        |
| <b>17</b>     | FEWVIM                                | -2443.83   | -2443.83   | 1.81802    | 18.06        | 39.68        |
| <b>18</b>     | [Fe(L <sub>19</sub> )py] <sup>+</sup> | -2831.19   | -2831.19   | -3.67381   | 21.81        | 28.15        |

Method: **OLYP**

| <i>System</i> | <i>Refcode</i>                        | <i>E(S=5/2)</i> | <i>E(S=1/2)</i> | $\Delta E$ | $\nu(S=5/2)$ | $\nu(S=1/2)$ |
|---------------|---------------------------------------|-----------------|-----------------|------------|--------------|--------------|
| <b>1</b>      | ATOJUO01                              | -3157.97        | -3157.97        | -1.75129   | 13.79        | 21.11        |
| <b>2</b>      | TAMTEH02                              | -4399.32        | -4399.32        | -2.46516   | 16.34        | 16.97        |
| <b>3</b>      | SUPHUH                                | -2865.62        | -2865.62        | -0.38274   | 15.74        | 19.54        |
| <b>4</b>      | BIMZUU                                | -2718.26        | -2718.25        | -6.17045   | 12.59        | 18.57        |
| <b>5</b>      | GOWSES                                | -2708.31        | -2708.30        | -4.84092   | 16.60        | 23.66        |
| <b>6</b>      | DADFAR                                | -3113.37        | -3113.36        | -3.81042   | 12.58        | 15.15        |
| <b>7</b>      | DADFOF                                | -5117.38        | -5117.37        | -3.42831   | 10.92        | 13.65        |
| <b>8</b>      | DADGAS                                | -2790.39        | -2790.38        | -4.90513   | 13.23        | 16.28        |
| <b>9</b>      | FONNAZ                                | -3113.73        | -3113.73        | -5.42070   | 12.82        | 17.27        |
| <b>10</b>     | HAJLAH                                | -2718.25        | -2718.24        | -5.62907   | 15.55        | 22.91        |
| <b>11</b>     | PORBUV                                | -8014.21        | -8014.21        | -0.92097   | 10.03        | 10.16        |
| <b>12</b>     | LIGZUY                                | -4077.27        | -4077.26        | -1.39940   | 9.59         | 13.87        |
| <b>13</b>     | LIZZUR                                | -2672.64        | -2672.63        | -6.18681   | 12.82        | 18.86        |
| <b>14</b>     | XIZKEY                                | -3460.42        | -3460.42        | -0.17500   | 6.95         | 8.49         |
| <b>15</b>     | XUJDOX                                | -2901.65        | -2901.63        | -6.43358   | 12.80        | 19.17        |
| <b>16</b>     | DETBEJ                                | -2641.67        | -2641.66        | -5.79526   | 14.31        | 15.49        |
| <b>17</b>     | FEWVIM                                | -2443.97        | -2443.96        | -1.21055   | 18.70        | 38.94        |
| <b>18</b>     | [Fe(L <sub>19</sub> )py] <sup>+</sup> | -2831.37        | -2831.36        | -6.24158   | 21.15        | 27.94        |

S2 - Effect of the Hartree-Fock exchange mixing on the BLYP functional over the spin-state energy gap and computed  $T_{1/2}$  for systems S4, S6 and S11

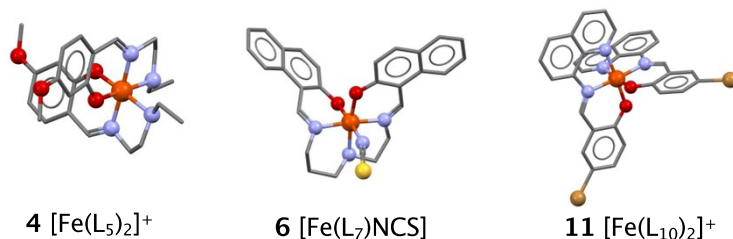

$L_5 = 2-(((2-(\text{ethylamino})\text{ethyl})\text{imino})\text{methyl})-5\text{-methoxyphenolato}$   $L_7 = 1-(((3-(((2-((\text{Hydroxy})-1\text{-naphthyl})\text{methylene})\text{amino})-\text{ethyl})\text{amino})\text{propyl})\text{imino})\text{methyl})-2\text{-naphtholato}$ ,  $L_{10} = 4\text{-Bromo-}2-(((\text{quinolin-}8\text{-yl})\text{imino})\text{methyl})\text{phenolato}$ .

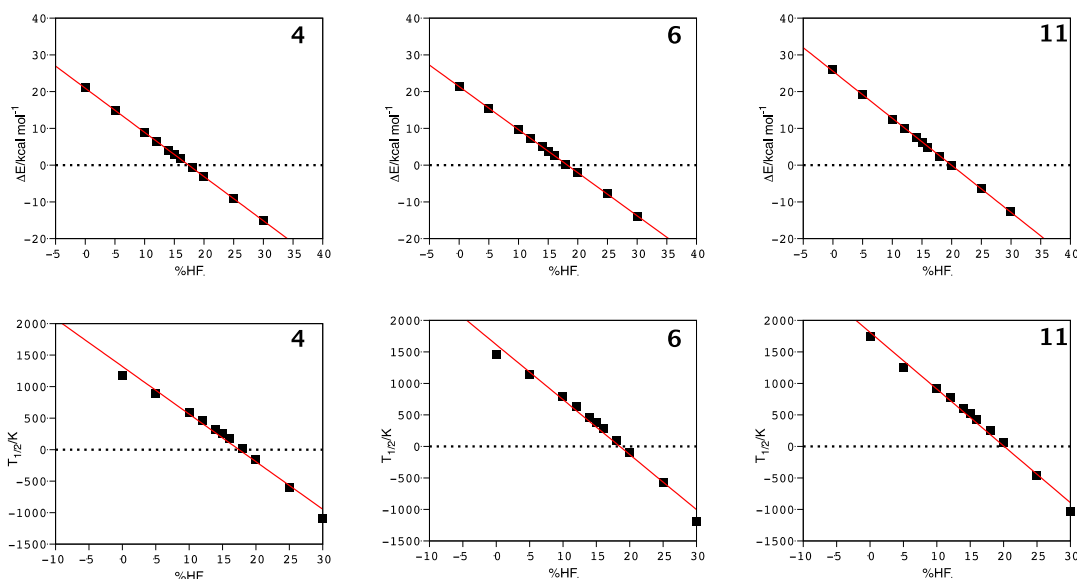

The amount of exact exchange Hartree-Fock to be mixed in the BLYP functional to match the experimental  $T_{1/2}$  for systems S4, S6 and S11 (152, 151 and 298 K respectively) can be computed using the corresponding fitted models. These values will be 15.04%, 16.39% and 16.43% respectively for systems S4, S6 and S11.



**S3.** A data set collection of computational results is available in the ioChem-BD repository<sup>[1]</sup> and can be accessed via <https://doi.org/10.19061/iochem-bd-6-108>

[1] Álvarez-Moreno, M.; de Graaf, C.; Lopez, N.; Maseras, F.; Poblet, J.M.; Bo, C. J. Chem. Inf. Model. 2015, 55, 95,103.

Table S4: List of experimentally available data for the studied systems, including solvent and counterion when available, and the corresponding  $T_{1/2}$ , in bulk phase

| <i>System</i> | <i>Refcode</i> | <i>Molecule</i>                                   | <i>Solvent</i>                                | <i>Counterion</i>                               | $T_{1/2}$                       | <i>reference</i> |
|---------------|----------------|---------------------------------------------------|-----------------------------------------------|-------------------------------------------------|---------------------------------|------------------|
| S1            | ATOJUO01       | [Fe(Hthsa)(thsa)]                                 | H <sub>2</sub> O                              | -                                               | 252                             | 1                |
| S2            | TAMTEH02       | [(TPA)Fe(TCC)] <sup>+</sup>                       | -                                             | [PF <sub>6</sub> ] <sup>-</sup>                 | 203-214                         | 2                |
|               | CAMYAR         | [(TPA)Fe(TCC)] <sup>+</sup>                       | H <sub>2</sub> O                              | ClO <sub>4</sub> <sup>-</sup>                   | 253                             | 3                |
|               | REWBAY         | [(TPA)Fe(TCC)] <sup>+</sup>                       | -                                             | [SbF <sub>6</sub> ] <sup>-</sup>                | 250                             | 4                |
|               | TAMTEH         | [(TPA)Fe(TCC)] <sup>+</sup>                       | -                                             | [PF <sub>6</sub> ] <sup>-</sup>                 | 204                             | 3                |
|               | TAMTIL         | [(TPA)Fe(TCC)] <sup>+</sup>                       | H <sub>2</sub> O                              | NO <sub>3</sub> <sup>-</sup>                    | 245                             | 3                |
| S3            | SUPHUH         | [Fe(qsal) <sub>2</sub> ] <sup>+</sup>             | CH <sub>3</sub> CN                            | [Ni(dmise) <sub>2</sub> ] <sup>-</sup>          | 241-256                         | 5                |
|               | VAWXIB         | [Fe(qsal) <sub>2</sub> ] <sup>+</sup>             | CH <sub>3</sub> CN                            | [Ni(dmit) <sub>2</sub> ] <sup>-</sup>           | 194-231                         | 6                |
|               | CIPVAB         | [Fe(qsal) <sub>2</sub> ] <sup>+</sup>             | -                                             | [Ni(mnt) <sub>2</sub> ] <sup>-</sup>            | 35                              | 7                |
|               | MUBPAA         | [Fe(qsal) <sub>2</sub> ] <sup>+</sup>             | MeOH                                          | NCS <sup>-</sup>                                | 212-352                         | 8                |
|               | MUBPEE         | [Fe(qsal) <sub>2</sub> ] <sup>+</sup>             | CH <sub>2</sub> Cl <sub>2</sub>               | NCS <sup>-</sup>                                | 212-392                         | 8                |
|               | QEDCUA         | [Fe(qsal) <sub>2</sub> ] <sup>+</sup>             | MeCN                                          | I <sup>-</sup>                                  | 160                             | 9                |
|               | QIXHIR         | [Fe(qsal) <sub>2</sub> ] <sup>+</sup>             | -                                             | MeOSO <sub>3</sub>                              | 402-414                         | 10               |
|               | QIXJEP         | [Fe(qsal) <sub>2</sub> ] <sup>+</sup>             | -                                             | [CF <sub>3</sub> SO <sub>3</sub> ] <sup>-</sup> | 361-365                         | 10               |
|               | QORGUB         | [Fe(qsal) <sub>2</sub> ] <sup>+</sup>             | MeOH                                          | [Fe(CN) <sub>5</sub> (NO)] <sup>-</sup>         | 122                             | 11               |
|               | QOYYEJ         | [Fe(qsal) <sub>2</sub> ] <sup>+</sup>             | -                                             | NCS <sup>-</sup>                                | 205-289                         | 12               |
|               | QOYYOT         | [Fe(qsal) <sub>2</sub> ] <sup>+</sup>             | -                                             | NCS <sup>-</sup>                                | 212-282                         | 12               |
|               | RESZAT         | [Fe(qsal) <sub>2</sub> ] <sup>+</sup>             | MeOH, H <sub>2</sub> O                        | [PhSO <sub>3</sub> ] <sup>-</sup>               | 195-205                         | 13               |
|               | UVUTEL         | [Fe(qsal) <sub>2</sub> ] <sup>+</sup>             | -                                             | I <sub>3</sub> <sup>-</sup>                     | 240                             | 14               |
|               | WAWTAS         | [Fe(qsal) <sub>2</sub> ] <sup>+</sup>             | -                                             | Cl <sup>-</sup>                                 | 268                             | 15               |
|               | S4             | BIMZUU                                            | [Fe(4-OMe-salEen) <sub>2</sub> ] <sup>+</sup> | -                                               | [PF <sub>6</sub> ] <sup>-</sup> | 225              |
| BINBEH        |                | [Fe(4-OMe-salEen) <sub>2</sub> ] <sup>+</sup>     | -                                             | NO <sub>3</sub> <sup>-</sup>                    | 75.5-81                         | 16               |
| S5            | GOWSES         | [Fe(salpet-Br)N <sub>3</sub> ]                    | MeOH                                          | -                                               | 140                             | 17               |
| S6            | DADFAR         | [Fe(napet)NCS]                                    | MeCN                                          | -                                               | 151                             | 18               |
| S7            | DADFOF         | [Fe(napet)NCSe]                                   | MeCN                                          | -                                               | 170                             | 18               |
| S8            | DADGAS         | [Fe(napet)NCO]                                    | -                                             | -                                               | 155                             | 18               |
| S9            | FONNAZ         | [Fe(salpet-3-OEt)NCS]                             | -                                             | -                                               | 83                              | 19               |
| S10           | HJLAH          | [Fe(3-OMe-salEen) <sub>2</sub> ] <sup>+</sup>     | -                                             | [PF <sub>6</sub> ] <sup>-</sup>                 | 162.5-165.5                     | 20               |
|               | ACOROA         | [Fe(3-OMe-salEen) <sub>2</sub> ] <sup>+</sup>     | -                                             | ClO <sub>4</sub> <sup>-</sup>                   | 196                             | 21               |
|               | GIRGOE         | [Fe(3-OMe-salEen) <sub>2</sub> ] <sup>+</sup>     | MeOH                                          | [Ni(dmit) <sub>2</sub> ] <sup>-</sup>           | 345                             | 22               |
|               | GIRGOE01       | [Fe(3-OMe-salEen) <sub>2</sub> ] <sup>+</sup>     | -                                             | [Ni(dmit) <sub>2</sub> ] <sup>-</sup>           | 275                             | 22               |
| S11           | PUGRIU         | [Fe(qsal-Br) <sub>2</sub> ] <sup>+</sup>          | Acetone                                       | [Ni(dmit) <sub>2</sub> ] <sup>-</sup>           | 273-286                         | 23               |
|               | JUGZUI         | [Fe(qsal-Br) <sub>2</sub> ] <sup>+</sup>          | CH <sub>2</sub> Cl <sub>2</sub>               | [Ni(dmit) <sub>2</sub> ] <sup>-</sup>           | 250                             | 23               |
|               | KORZAU         | [Fe(qsal-Br) <sub>2</sub> ] <sup>+</sup>          | MeOH                                          | NO <sub>3</sub> <sup>-</sup>                    | 128-144,<br>229-234             | 24               |
|               | PORBUV         | [Fe(qsal-Br) <sub>2</sub> ] <sup>+</sup>          | MeOH                                          | NCS <sup>-</sup>                                | 340                             | 25               |
|               | QOLPAL         | [Fe(qsal-Br) <sub>2</sub> ] <sup>+</sup>          | H <sub>2</sub> O                              | [OTs] <sup>-</sup>                              | 258-260                         | 26               |
| S12           | LIGZUY         | [Fe(5-Cl-Hthsa)(5-Cl-thsa)]                       | H <sub>2</sub> O                              | -                                               | 230-231                         | 1                |
| S13           | LIZZUR         | [Fe(Him) <sub>2</sub> (hapen)] <sup>+</sup>       | -                                             | [AsF <sub>6</sub> ] <sup>-</sup>                | 69.4-74.0                       | 27               |
|               | GEWYEP         | [Fe(Him) <sub>2</sub> (hapen)] <sup>+</sup>       | -                                             | [SbF <sub>6</sub> ] <sup>-</sup>                | 105                             | 28               |
|               | ZEWTIG         | [Fe(Him) <sub>2</sub> (hapen)] <sup>+</sup>       | H <sub>2</sub> O                              | [PF <sub>6</sub> ] <sup>-</sup>                 | 78                              | 29               |
|               | ZEWVAA         | [Fe(Him) <sub>2</sub> (hapen)] <sup>+</sup>       | H <sub>2</sub> O                              | CF <sub>3</sub> SO <sub>3</sub> <sup>-</sup>    | 50-200                          | 29               |
| S14           | XIZKEY         | [Fe(Iqsal) <sub>2</sub> ] <sup>+</sup>            | MeCN, H <sub>2</sub> O                        | [Ni(dmit) <sub>2</sub> ] <sup>-</sup>           | 150-156                         | 30               |
|               | LECLUD         | [Fe(Iqsal) <sub>2</sub> ] <sup>+</sup>            | -                                             | [NTf <sub>2</sub> ] <sup>-</sup>                | 244-278                         | 31               |
|               | QOLPIT         | [Fe(Iqsal) <sub>2</sub> ] <sup>+</sup>            | H <sub>2</sub> O                              | [OTs] <sup>-</sup>                              | 298                             | 26               |
|               | TAQZET         | [Fe(Iqsal) <sub>2</sub> ] <sup>+</sup>            | EtOH                                          | [OTf] <sup>-</sup>                              | 139-219                         | 32               |
|               | TARBAS         | [Fe(Iqsal) <sub>2</sub> ] <sup>+</sup>            | n-PrOH                                        | [OTf] <sup>-</sup>                              | 199                             | 32               |
|               | TARBAS02       | [Fe(Iqsal) <sub>2</sub> ] <sup>+</sup>            | o-PrOH                                        | [OTf] <sup>-</sup>                              | 251                             | 32               |
|               | YICBIX         | [Fe(Iqsal) <sub>2</sub> ] <sup>+</sup>            | MeOH                                          | [OTf] <sup>-</sup>                              | 227-237                         | 33               |
| S15           | XUJDOX         | [Fe(Him) <sub>2</sub> (4-OMe-hapen)] <sup>+</sup> | -                                             | [PF <sub>6</sub> ] <sup>-</sup>                 | 150                             | 34               |
|               | PUKZIH         | [Fe(Him) <sub>2</sub> (4-OMe-hapen)] <sup>+</sup> | -                                             | [MeSO <sub>3</sub> ] <sup>-</sup>               | 163-167                         |                  |

|     |        |                                                   |   |                                  |         |               |
|-----|--------|---------------------------------------------------|---|----------------------------------|---------|---------------|
|     | WUVRUC | [Fe(Him) <sub>2</sub> (4-OMe-hapen)] <sup>+</sup> |   | [OTf] <sup>-</sup>               | 192-193 | <sup>35</sup> |
| S16 | DETBEJ | [Fe(salten)(Pic)] <sup>2+</sup>                   | - | [BPh <sub>4</sub> ] <sup>-</sup> | 260     | <sup>36</sup> |
| S17 |        | [Fe(acen)(Him) <sub>2</sub> ] <sup>+</sup>        | - | [BPh <sub>4</sub> ] <sup>-</sup> | 318     | <sup>37</sup> |
| S18 |        | [Fe(py)(salten-3-OMe)] <sup>+</sup>               |   | [BPh <sub>4</sub> ] <sup>-</sup> | 235-281 | <sup>38</sup> |
|     |        |                                                   |   |                                  |         |               |
|     |        |                                                   |   |                                  |         |               |
|     |        |                                                   |   |                                  |         |               |
|     |        |                                                   |   |                                  |         |               |
|     |        |                                                   |   |                                  |         |               |
|     |        |                                                   |   |                                  |         |               |

Table S5: List of experimentally available data for systems S11, S16, S17 and S18, including counterion when available, and the corresponding  $T_{1/2}$ , with measurements done in solution

| System | Molecule                                   | Counterion                       | $\Delta H$ | $\Delta S$ | $T_{1/2}$          | Reference     |
|--------|--------------------------------------------|----------------------------------|------------|------------|--------------------|---------------|
| S11    | [Fe(qsal-Br) <sub>2</sub> ] <sup>+</sup>   |                                  |            |            | 298 <sup>[a]</sup> | <sup>25</sup> |
| S16    | [Fe(salten)(Pic)] <sup>2+</sup>            | [BPh <sub>4</sub> ] <sup>-</sup> | 9.8        | 43.8       | 224                | <sup>37</sup> |
| S17    | [Fe(acen)(Him) <sub>2</sub> ] <sup>+</sup> | [BPh <sub>4</sub> ] <sup>-</sup> | 8.8        | 23.7       | 318                | <sup>37</sup> |
| S18    | [Fe(py)(salten-3-OMe)] <sup>+</sup>        | [BPh <sub>4</sub> ] <sup>-</sup> | 19.6       | 82.8       | 237                | <sup>38</sup> |

[a] The data in the SI of the publication indicates 49% of conversion at 298K, but no thermochemical data.

#### References:

- 1 E. W. T. Yemeli, G. R. Blake, A. P. Douvalis, T. Bakas, G. O. R. Alberda van Ekenstein and P. J. Koningsbruggen, *Chem. – A Eur. J.*, 2019, **25**, 16766–16776.
- 2 E. Collet, M.-L. Boillot, J. Hebert, N. Moisan, M. Servol, M. Lorenc, L. Toupet, M. Buron-Le Cointe, A. Tissot and J. Sainton, *Acta Crystallogr. Sect. B Struct. Sci.*, 2009, **65**, 474–480.
- 3 S. Floquet, A. J. Simaan, E. Rivière, M. Nierlich, P. Thuéry, J. Ensling, P. Gütllich, J.-J. Girerd and M.-L. Boillot, *Dalton Trans.*, 2005, 1734–1742.
- 4 A. Tissot, H. J. Shepherd, L. Toupet, E. Collet, J. Sainton, G. Molnár, P. Guionneau and M.-L. Boillot, *Eur. J. Inorg. Chem.*, 2013, **2013**, 1001–1008.
- 5 K. Takahashi, H. Mori, H. Kobayashi and O. Sato, *Polyhedron*, 2009, **28**, 1776–1781.
- 6 K. Takahashi, H. Cui, H. Kobayashi, Y. Einaga and O. Sato, *Chem. Lett.*, 2005, **34**, 1240–1241.
- 7 K. Takahashi, T. Sakurai, W.-M. Zhang, S. Okubo, H. Ohta, T. Yamamoto, Y. Einaga and H. Mori, *Inorganics*, 2017, **5**, 54.
- 8 S. Hayami, Z. Gu, H. Yoshiki, A. Fujishima and O. Sato, *J. Am. Chem. Soc.*, 2001, **123**, 11644–11650.
- 9 I.-R. Jeon, C. Mathonière, R. Clérac, M. Rouzières, O. Jeannin, E. Trzop, E. Collet and M. Fourmigué, *Chem. Commun.*, 2017, **53**, 10283–10286.
- 10 K. Takahashi, K. Yamamoto, T. Yamamoto, Y. Einaga, Y. Shiota, K. Yoshizawa and H. Mori, *Crystals*, 2019, **9**, 81.
- 11 T. Togo, S. A. Amolegbe, R. Yamaguchi, T. Kuroda-Sowa, M. Nakaya, K.

- Shimayama, M. Nakamura and S. Hayami, *Chem. Lett.*, 2013, **42**, 1542–1544.
- 12 S. Hayami, K. Hiki, T. Kawahara, Y. Maeda, D. Urakami, K. Inoue, M. Ohama, S. Kawata and O. Sato, *Chem. - A Eur. J.*, 2009, **15**, 3497–3508.
- 13 A. Tsukiashi, M. Nakaya, F. Kobayashi, R. Ohtani, M. Nakamura, J. M. Harrowfield, Y. Kim and S. Hayami, *Inorg. Chem.*, 2018, **57**, 2834–2842.
- 14 K. Takahashi, T. Sato, H. Mori, H. Tajima and O. Sato, *Phys. B Condens. Matter*, 2010, **405**, S65–S68.
- 15 I.-R. Jeon, O. Jeannin, R. Clérac, M. Rouzières and M. Fourmigué, *Chem. Commun.*, 2017, **53**, 4989–4992.
- 16 A. Tissot, P. Fertey, R. Guillot, V. Briois and M.-L. Boillot, *Eur. J. Inorg. Chem.*, 2014, **2014**, 101–109.
- 17 C. Krüger, P. Augustín, L. Dlháň, J. Pavlik, J. Moncol', I. Nemeč, R. Boča and F. Renz, *Polyhedron*, 2015, **87**, 194–201.
- 18 I. Nemeč, R. Herchel, R. Boča, Z. Trávníček, I. Svoboda, H. Fuess and W. Linert, *Dalton Trans.*, 2011, **40**, 10090–10099.
- 19 P. Masárová, P. Zoufalý, J. Moncol, I. Nemeč, J. Pavlik, M. Gembický, Z. Trávníček, R. Boča and I. Šalitraš, *New J. Chem.*, 2015, **39**, 508–519.
- 20 A. Tissot, R. Bertoni, E. Collet, L. Toupet and M.-L. Boillot, *J. Mater. Chem.*, 2011, **21**, 18347.
- 21 S. Hayami, S. Miyazaki, M. Yamamoto, K. Hiki, N. Motokawa, A. Shuto, K. Inoue, T. Shinmyozu and Y. Maeda, *Bull. Chem. Soc. Jpn.*, 2006, **79**, 442–450.
- 22 C. Faulmann, K. Jacob, S. Dorbes, S. Lampert, I. Malfant, M.-L. Doublet, L. Valade and J. A. Real, *Inorg. Chem.*, 2007, **46**, 8548–8559.
- 23 B. J. C. Vieira, J. C. Dias, I. C. Santos, L. C. J. Pereira, V. da Gama and J. C. Waerenborgh, *Inorg. Chem.*, 2015, **54**, 1354–1362.
- 24 D. J. Harding, W. Phonsri, P. Harding, K. S. Murray, B. Moubaraki and G. N. L. Jameson, *Dalton Trans.*, 2015, **44**, 15079–15082.
- 25 W. Phonsri, D. J. Harding, P. Harding, K. S. Murray, B. Moubaraki, I. A. Gass, J. D. Cashion, G. N. L. Jameson and H. Adams, *Dalton Trans.*, 2014, **43**, 17509–17518.
- 26 S. E. Lazaro, A. Alkaş, S. J. Lee, S. G. Telfer, K. S. Murray, W. Phonsri, P. Harding and D. J. Harding, *Dalton Trans.*, 2019, **48**, 15515–15520.
- 27 T. Fujinami, M. Koike, N. Matsumoto, Y. Sunatsuki, A. Okazawa and N. Kojima, *Inorg. Chem.*, 2014, **53**, 2254–2259.
- 28 T. Ueno, K. Miyano, D. Hamada, H. Ono, T. Fujinami, N. Matsumoto and Y. Sunatsuki, *Magnetochemistry*, 2015, **1**, 72–82.
- 29 M. Koike, K. Murakami, T. Fujinami, K. Nishi, N. Matsumoto and Y. Sunatsuki, *Inorganica Chim. Acta*, 2013, **399**, 185–192.
- 30 K. Fukuroi, K. Takahashi, T. Mochida, T. Sakurai, H. Ohta, T. Yamamoto, Y. Einaga and H. Mori, *Angew. Chemie Int. Ed.*, 2014, **53**, 1983–1986.
- 31 N. Phukkaphan, D. L. Cruickshank, K. S. Murray, W. Phonsri, P. Harding and D. J. Harding, *Chem. Commun.*, 2017, **53**, 9801–9804.
- 32 W. Phonsri, P. Harding, L. Liu, S. G. Telfer, K. S. Murray, B. Moubaraki, T. M. Ross, G. N. L. Jameson and D. J. Harding, *Chem. Sci.*, 2017, **8**, 3949–3959.
- 33 D. J. Harding, W. Phonsri, P. Harding, I. A. Gass, K. S. Murray, B. Moubaraki, J. D. Cashion, L. Liu and S. G. Telfer, *Chem. Commun.*, 2013, **49**, 6340.
- 34 T. Fujinami, M. Ikeda, M. Koike, N. Matsumoto, T. Oishi and Y. Sunatsuki, *Inorganica Chim. Acta*, 2015, **432**, 89–95.
- 35 K. Miyano, T. Nishida, H. Ono, D. Hamada, T. Fujinami, N. Matsumoto and Y. Sunatsuki, *Inorganica Chim. Acta*, 2016, **439**, 49–54.

- 36 N. Matsumoto, S. Ohta, C. Yoshimura, A. Ohyoshi, S. Kohata, H. Okawa and Y. Maeda, *J. Chem. Soc., Dalton Trans.*, 1985, 2575.
- 37 M. Y. Volkov, E. N. Frolova, L. V. Mingalieva, L. G. Gafiyatullin, O. A. Turanova, E. O. Milordova, I. V. Ovchinnikov and A. N. Turanov, *Polyhedron*, 2018, **154**, 407–410.
- 38 A. Ohyoshi, J. Honbo, N. Matsumoto, S. Ohta and S. Sakamoto, *Bull. Chem. Soc. Jpn.*, 1986, **59**, 1611–1613.
